1  
2  
3  
4  
5  
6  
7  
8  
9  
10  
11  
12  
13  
14  
15  
16  
17  
18  
19  
20  
21  
22  
23

## TITLE PAGE

**For a structured response to the psychosocial consequences of the restrictive measures imposed by the global COVID-19 health pandemic: The MAVIPAN longitudinal prospective cohort study protocol**

## AUTHORS

Annie LeBlanc, Ph.D.<sup>1,2</sup>, Marie Baron, Ph.D.<sup>2</sup>, Patrick Blouin, M.A.<sup>2</sup>, George Tarabulsky, Ph.D.<sup>3,4</sup>, François Routhier, Ph.D.<sup>1,6</sup>, Catherine Mercier, Ph.D.<sup>1,6</sup>, Jean-Pierre Després, Ph.D.<sup>1,2</sup>, Marc Hébert, Ph.D.<sup>1,5</sup>, Yves De Koninck, Ph.D.<sup>1,5</sup>, Caroline Cellard, Ph.D.<sup>3,5</sup>, Delphine Collin-Vézina, Ph.D.<sup>4,13</sup>, Nancy Côté, Ph.D.<sup>3,4</sup>, Marie-Pier Déry B.Sc.<sup>2</sup>, Émilie Dionne, Ph.D.<sup>2</sup>, Richard Fleet, M.D.<sup>1,2</sup>, Marie-Hélène Gagné, Ph.D.<sup>3,4</sup>, Maripier Isabelle, Ph.D.<sup>3,5</sup>, Lily Lessard, Ph.D.<sup>10,11</sup>, Matthew Menear, Ph.D.<sup>1,2</sup>, Chantal Mérette, Ph.D.<sup>1,5</sup>, Marie-Christine Ouellet, Ph.D.<sup>3,6</sup>, Marc-André Roy, M.D., M.Sc.<sup>1,5</sup>, Marie-Christine Saint-Jacques, Ph.D.<sup>3,4</sup>, Claudia Savard, Ph.D.<sup>12,5</sup>, on behalf of the MAVIPAN Research Collaboration.

## THE MAVIPAN RESEARCH COLLABORATION

Annie LeBlanc, Ph.D.<sup>1,2</sup>, Marie Baron, Ph.D.<sup>2</sup>, Patrick Blouin, M.A.<sup>2</sup>, Jean-Pierre Després, Ph.D.<sup>1,2</sup>, Nancy Côté, Ph.D.<sup>2,3</sup>, Émilie Dionne, Ph.D.<sup>2</sup>, Richard Fleet, M.D.<sup>1,2</sup>, Matthew Menear, Ph.D.<sup>1,2</sup>, Marie-Pier Déry, B.A.<sup>2</sup>, Marie-Pierre Gagnon, Ph.D.<sup>2,8</sup>, Holly Witteman, Ph.D.<sup>1,2</sup>, Patrick Archambault, M.D., M.Sc.<sup>1,2</sup>, Geneviève Roch, Ph.D.<sup>2,8</sup>, Éric Gagnon, Ph.D.<sup>2,3</sup>, Antoine Groulx, MD, M.Sc.<sup>1,2</sup>, George Tarabulsky, Ph.D.<sup>3,4</sup>, Delphine Collin-Vézina, Ph.D.<sup>4,13</sup>, Marie-Hélène Gagné, Ph.D.<sup>3,4</sup>, Marie-Christine Saint-Jacques, Ph.D.<sup>3,4</sup>, Danielle Nadeau, Ph.D.<sup>4</sup>, Julie Tremblay, M.A.<sup>4</sup>, Geneviève Dionne, M.Sc.<sup>4</sup>, Marie-Claude Simard, Ph.D.<sup>4</sup>, Annie Bérubé, Ph.D.<sup>4,7</sup>, Marc Hébert, Ph.D.<sup>1,5</sup>, Yves De Koninck, Ph.D.<sup>1,5</sup>, Caroline Cellard, Ph.D.<sup>3,5</sup>, Maripier Isabelle, Ph.D.<sup>3,5</sup>, Chantal Mérette, Ph.D.<sup>1,5</sup>, Marc-André Roy, M.D., M.Sc.<sup>1,5</sup>, Claudia Savard,

24 Ph.D.<sup>5, 12</sup>, Martin Provencher, Ph.D.<sup>3, 5</sup>, Annie Vallières, Ph. D.<sup>3, 5</sup>, Marie-France Demers, M.Sc.,  
25 BCPP<sup>5, 17</sup>, Pierre Marquet, M.D., Ph.D.<sup>1, 5</sup>, François Routhier, Ph.D.<sup>1, 6</sup>, Catherine Mercier, Ph.D.<sup>1,</sup>  
26 <sup>6</sup>, Marie-Christine Ouellet, Ph.D.<sup>3, 6</sup>, Marie-Ève Lamontagne, Ph.D.<sup>1, 6</sup>, Simon Beaulieu-Bonneau,  
27 Ph. D.<sup>3, 6</sup>, Normand Boucher, Ph.D.<sup>6</sup>, Michel Gilbert, B.Ed.<sup>15</sup>, Denis Lafortune, Ph.D.<sup>9</sup>, Lily  
28 Lessard, Ph. D.<sup>10, 11</sup>, Marie-Hélène Morin, Ph.D.<sup>14</sup>, Édith St-Hilaire, M.Ps.<sup>16</sup>, Luc Vigneault,  
29 Patient partner.

## 30 **AUTHORS' AFFILIATIONS**

31 <sup>1</sup> Faculté de médecine, Université Laval; <sup>2</sup> VITAM, Centre de recherche en santé durable; <sup>3</sup> Faculté des sciences  
32 sociales, Université Laval; <sup>4</sup> Centre de recherche universitaire sur les jeunes et les familles (CRUJeF), <sup>5</sup> Centre de  
33 recherche CERVO; <sup>6</sup> Centre interdisciplinaire de recherche en réadaptation et intégration sociale (CIRRIS); <sup>7</sup>  
34 Département de psychoéducation et de psychologie, Université du Québec en Outaouais; <sup>8</sup> Faculté des sciences  
35 infirmières, Université Laval; <sup>9</sup> Faculté des arts et des lettres, Université de Montréal; <sup>10</sup> Département des Sciences  
36 de la santé, UQAR; <sup>11</sup> SASSS Centre de recherche de Chaudière-Appalaches; <sup>12</sup> Faculté des sciences de  
37 l'éducation, Université Laval; <sup>13</sup> Faculty of Arts, McGill University; <sup>14</sup> Département de psychologie et travail  
38 social, UQAR; <sup>15</sup> National Centre of Excellence in Mental Health (Montreal, QC); <sup>16</sup> CISSS-CA; <sup>17</sup> Faculté de  
39 pharmacie, Université Laval.

## 41 **ABSTRACT**

### 42 **Background**

43 The COVID-19 pandemic and the isolation measures taken to control it has caused important  
44 disruptions in economies and labour markets, changed the way we work and socialize, forced  
45 schools to close and healthcare and social services to reorganize in order to redirect resources on  
46 the pandemic response. This unprecedented crisis forces individuals to make considerable efforts  
47 to adapt and can have serious psychological and social consequences that are likely to persist  
48 once the pandemic has been contained and restrictive measures lifted. These impacts will

49 be significant for vulnerable individuals and will most likely exacerbate existing social and  
50 gender health and social inequalities. This crisis also puts a toll on the capacity of our healthcare  
51 and social services structures to provide timely and adequate care. In order to minimize these  
52 consequences, there is an urgent need for high-quality, real-time information on the psychosocial  
53 impacts of the pandemic. The MAVIPAN (*Ma vie et la pandémie/My life with the*  
54 *pandemic*) study aims to document how individuals, families, healthcare workers,  
55 and health organisations that provide services are affected by the pandemic and how they adapt.

## 56 **Methods**

57 The MAVIPAN study is a 5-year longitudinal prospective cohort study that was launched on  
58 April 29<sup>th</sup>, 2020 in the province of Quebec which, at that time, was the epicenter of the pandemic  
59 in Canada. Quantitative data is collected through online questionnaires approximately 5 times a  
60 year depending on the pandemic evolution. Questionnaires include measures of health, social,  
61 behavioral and individual determinants as well as psychosocial impacts. Qualitative data will be  
62 collected with individual and group interviews that seek to deepen our understanding of coping  
63 strategies.

## 64 **Discussion**

65 The MAVIPAN study will support the healthcare and social services system response  
66 by providing the evidence base needed to identify those who are most affected by the pandemic  
67 and by guiding public health authorities' decision making regarding intervention and resource  
68 allocation to mitigate these impacts. It is also a unique opportunity to advance our knowledge on  
69 coping mechanisms and adjustment strategies.

70 **Trial registration:** NCT04575571 (retrospectively registered)

71

72

## **KEYWORDS**

73 *COVID-19, Pandemics, Mental Health, Psychological Adaptation, Health Personnel,*  
74 *Longitudinal Studies*

75 **BACKGROUND**

76 The health crisis imposed by COVID-19 is forcing major worldwide social reorganization that  
77 will have profound consequences on our society [1]. Affected countries have been attempting to  
78 contain the spread of the virus by requiring extraordinary isolation efforts from their populations  
79 [2, 3]. One-third of the world's population (~3 billion individuals) has, is or will again experience  
80 some kind of isolation measures, causing an unprecedented and rapidly evolving psychosocial  
81 crisis [4-7]. While biomedical research is relentlessly pursuing its efforts to understand the  
82 impact of the disease on infected individuals and to develop new treatments and vaccines, its  
83 psychosocial consequences that could permanently affect our wellbeing, the state of our health  
84 system, and our society cannot be ignored [7-10].

85 Failure to address psychosocial and health issues will prolong the impact of the pandemic for  
86 years to come. The psychosocial consequences of this health crisis will spare no one, particularly  
87 vulnerable individuals, and will persist long after restriction measures are lifted and the pandemic  
88 is over [7, 9, 11, 12]. The combination of professional changes, the state of being "at risk", the  
89 possible loss of employment, the resulting economic difficulties, changes in couple and family  
90 dynamics, school closures and the reduction of services in health and social services network may  
91 all have an impact on the adjustment and development of individuals of all ages [13-17]. This  
92 impact will be significant for individuals facing unique contexts or challenges (e.g., older adults,  
93 individuals living with a disability, individuals with a chronic or mental health condition,  
94 underprivileged families) and will most likely exacerbate existing social, racial and gender  
95 inequalities in health and human development [18-25].

96 The scale of the current COVID-19 mobilization has destabilized several aspects of our health  
97 and social services structures. Services are being suspended, others are being maintained or  
98 intensified, and new intervention strategies are rapidly being adopted to adjust to containment  
99 measures or risk of virus transmission [26, 27]. Service interruptions, amongst others, have an  
100 impact on the physical and mental health and subsequent development of already vulnerable  
101 individuals [28]. Health and social services workers are experiencing major changes in their  
102 practice during this crisis [9, 29]. Many of these workers bear constant witness to the human toll  
103 of the pandemic and, all too often, become part of it [9, 30, 31]. This occurs in a context where  
104 these workers are subject to the same measures as the rest of the population, thus placing greater  
105 demands on their ability to adapt [30, 32, 33]. It is crucial to document practice changes and  
106 adjustments of these individuals, who must remain available for their family, colleagues and the  
107 population.

108 Recovering from the pandemic will require a social and economic response that is just as  
109 important as the current efforts to minimize the spread of infection [1, 34]. There is an urgent  
110 need for information on the evolution of the psychosocial dimensions of health and coping  
111 strategies used by our population and our health and social services structures. By  
112 comprehensively documenting such information, stakeholders will be in a better position to make  
113 timely informed decisions and implement strategies to minimize the expected consequences of  
114 the crisis on our mental health and well-being.

115 The MAVIPAN (*Ma vie et la pandémie*) cohort was developed in response to these individual  
116 and collective needs. It was born out of an unprecedented collective effort between the 4 research  
117 centers of the Quebec Integrated University Health & Social Services Center and their province-  
118 wide academic, governmental, institutional and community partners.

119 **METHODS**

120 **Aims**

121 Overall, MAVIPAN aims to accelerate the availability of high-quality, real-time evidence within  
122 health and social services structures to address, support and minimize ongoing and future, direct  
123 and indirect, psychosocial consequences of the COVID-19 pandemic. Working toward that goal,  
124 through constantly evolving research questions responsive to the pandemic evolution and  
125 knowledge users (KUs) needs, we will document, monitor, and evaluate the following:

126 (i) Individual and family adjustment and mitigation strategies, especially for those considered  
127 vulnerable and in high-risk contexts (e.g., What are the psychosocial and professional  
128 characteristics of the most vulnerable participants? What are the characteristics of those who  
129 seem to be coping well and who may have even improved during confinement? How are families  
130 coping over time?);

131 (ii) Healthcare, social services and frontline worker adjustment and mitigation strategies (e.g.,  
132 What is the role of coping and adaptive strategies on the wellbeing and psychological health of  
133 our workers? Are there specific sectors of activity or levels of responsibility that are more  
134 vulnerable to adjustment issues? What are the predictive factors of burnout amongst healthcare  
135 workers?);

136 (iii) The organization of service structures (e.g., What are the mental health and social service  
137 needs non-related to COVID-19 that are not covered or poorly covered by current services? How  
138 have some services reorganized to provide appropriate levels of care and minimize barriers to  
139 care delivery?) and

140 (iv) The social and economic response (e.g., What are the economic, social and community-based  
141 initiatives that have contributed to mental health wellness? What health or social services should  
142 be prioritized upon another confinement?).

143 We have established strategic research priorities under key themes to address our objectives. We  
144 have identified Health inequities and mental health as cross-cutting themes across our objectives.  
145 Additional key themes have emerged from sources most likely to increase vulnerability during  
146 this health crisis: social environment and health, chronic diseases and disabilities, and frontline,  
147 health and social workers. Together, these strategic research priorities will be used as an evolving  
148 roadmap to assess the level and extent to which we are addressing our research objectives in a  
149 way that meets the needs of KUs and state of current knowledge.

## 150 **Conceptual Underpinnings**

151 The proposed approach draws from discussions with and lessons learned from KUs and field  
152 experts, literature reviews on the psychosocial impacts of disasters, quarantine, and long-term  
153 inequalities resulting from crises, and considerations of the strongest study design with the least  
154 risk of bias, while considering the complexities of the current and evolving pandemic situation.

155 MAVIPAN is grounded into the (i) Integrated Knowledge Translation (iKT) approach that  
156 actively involves KUs throughout the entire research process and its governance to enhance the  
157 relevance and uptake of results, [35] and the complementary (ii) SPOR Patient Engagement  
158 Framework to foster a climate in which researchers and KUs understand the value of patient  
159 involvement [36]. The design, measures, and analyses are further informed by the (i) Model of  
160 Psychosocial Impact of Natural Disasters that specifically addresses coping mechanisms and  
161 mitigation strategies during traumatic events, [37] and the (ii) Dahlgren and Whitehead's Model  
162 of the Social Determinants of Health that identifies the environmental, social, and individual

163 spheres of influence that hinder or enhance the health of individuals and create inequities  
164 between populations [38]. We will add to this model by considering structural and political  
165 determinants of health, which are emerging in the critical race literature [39-41].

## 166 **Study Design**

167 MAVIPAN is a mixed-methods based, prospective, observational, longitudinal cohort where  
168 participants will be followed over a 5-yr period [42]. We will collect quantitative and qualitative  
169 data at time of recruitment and then according to the 4 expected phases of the pandemic  
170 evolution: the impact phase we are experiencing, the turning point phase when the crisis is  
171 brought under control, the recovery phase, and the post crisis following a new "normal",  
172 accounting for additional infection waves and major events (e.g., vaccines) (Figure 1). The  
173 longitudinal aspect of the cohort sets itself apart. The collection of information related to the  
174 same individual at multiple points throughout the evolution of the crisis allows for a unique  
175 understanding and insights into mechanisms at play, temporal relationships with key crisis  
176 events, and the persistent or transient nature of the psychosocial impacts, and can inform when  
177 and how to intervene [43, 44]. The use of mixed methods is well-suited for this proposal and adds  
178 to its significance [45]. Quantitative data measure indicators, determinants, and impacts (short,  
179 mid and long term). Qualitative data build a reflexive approach into the determinants, and will be  
180 central to exploring and identifying unexpected impacts and adaptation strategies experienced by  
181 participants.

## 182 **Participants**

183 MAVIPAN is open to any individual aged 14 and over who understands French or English across  
184 the Province of Quebec, the epicentre of Canada's COVID-19 epidemic [46]. Within this  
185 province, we have been and will continue to reach individuals in urban, suburban and rural areas



186 where different numbers of COVID-19 cases (from no cases to hotspots) are found. We are  
187 particularly invested in recruiting vulnerable populations (e.g., older adults, individuals living  
188 with a disability or a chronic/mental health condition, minorities, child protection families,  
189 individuals living in institutional settings) and populations that have become vulnerable because  
190 of the COVID-19 context (e.g., healthcare and social services workers, adolescents and young  
191 adults, caregivers).

## 192 **Recruitment**

193 We continue to systematically recruit across the province, through our website [47], lead media,  
194 social media and networks (e.g., Twitter, Facebook), and mass diffusion across healthcare  
195 establishments, universities and large networks. We are supported by regional Public Health  
196 Directions from healthcare establishments across the province. We have established and continue  
197 to seek collaborations with urban and rural cities (e.g., City Halls) who promote MAVIPAN  
198 through their networks. We developed a recruitment plan tailored to our vulnerable populations,  
199 that includes collaborations with (i) key clinical departments and programs (e.g., COVID-19  
200 clinic) and communication offices within healthcare establishments across the province to  
201 directly reach patients and clients, (ii) community-based organizations and (iii) provincial  
202 thematic networks or associations.

## 203 **Retention Plan**

204 We recognize the challenge of loss to follow-up in prospective cohorts [43, 44, 48]. We have  
205 developed a retention plan that includes, but is not limited to: study branding and publicity,  
206 incentives (e.g., annual gift certificates), personalized email messages, intermittent lay language  
207 summary of findings disseminated to participants, and an individualized study page to keep  
208 participants informed and engaged [49-51].

## 209 **Quantitative Data Collection**

210 We collect quantitative data through online questionnaires using the REDCap electronic data  
211 acquisition platform that is maintained by Université Laval Collaborative platform for large-scale  
212 and sustainable data collection Pulsar [52]. Registration, consent and questionnaires can be  
213 completed on different digital devices, in French or English. We also provide support for people  
214 who do not have access to the Internet or to a computer, have limited digital literacy, or have a  
215 disability (e.g., manual-gestural language, research assistant).

216 Participants can register at any point over the course of the study and complete a thorough  
217 baseline questionnaire (30-45 min). Additional questionnaires, up to 4 per year, will be tailored to  
218 key events in the crisis evolution (e.g., second wave) and change in restrictive measures (e.g.,  
219 closing of schools). These include a brief (15 min), standardized follow-up questionnaire which  
220 we intend to administer at least twice a year and ad hoc questionnaires (<30 min) aligned with  
221 key events (e.g., vaccine). A notice and then one reminder is sent to participants when a new  
222 questionnaire becomes available. Participants are given a week to complete questionnaires (i.e.  
223 they can start filling a questionnaire, stop at any time and come back to their saved  
224 questionnaire). Questionnaires have been and will continue to be developed and pilot tested with  
225 key experts and KUs, using brief (instead of exhaustive) validated measures when available.

## 226 **Measures**

227 We selected well-validated measures based upon our theoretical models, Public Health  
228 recommendations, expert consensus, and KUs' inputs [35, 37, 53]. We document health, social,  
229 behavioral and individual determinants and psychosocial impacts of the pandemic for baseline  
230 and follow-up questionnaires (Figure 2) [54-70]. We further added specific measures and  
231 indicators for vulnerable populations, such as disease management, changes in life circumstances

232 attributable to the pandemic, or caregiver burden. Participants have the opportunity to fill in  
233 open-ended questions addressing current or expected challenges, helpful innovations, hopeful  
234 moments, and additional topics they would want to see addressed in future questionnaires.

### 235 **Linkage**

236 At registration, we ask participants if they agree to be contacted for additional research  
237 opportunities. This allows us to add ancillary protocols (e.g., interviews with subsets of  
238 participants) in response to the pandemic evolution, our findings, and the needs of KUs, thus  
239 substantially improving the quality and relevance of the information that is gathered.  
240 Furthermore, this allows for opportunities to link MAVIPAN with provincial, national and  
241 international COVID-19 related initiatives, thus fostering dynamic, multidisciplinary  
242 collaborations leading to increased impact.

### 243 **Qualitative data collection**

244 Each ancillary qualitative protocol will be unique yet (i) will share common elements of their  
245 interview guide (e.g., mitigation strategies, impact of the pandemic) and (ii) rely on best practices  
246 for the conduct of its activities [71, 72]. We will conduct semi-structured interviews and focus  
247 groups mainly through securitized online medium (e.g., Zoom, Microsoft Teams) for the time  
248 being and will adapt as the restrictive measures are lifted. Length and number of participants will  
249 be tailored to each research question. Additional approaches (e.g., observations) could be added if  
250 relevant.

### 251 **Ethics**

252 We have worked and continue to work in close collaboration with our Research Ethics  
253 Committee, who has been instrumental in designing this “living” cohort. We have set templates

254 and procedures in place allowing for an agile process and rapid response (e.g., within days) to  
255 new questionnaires and ancillary protocols being submitted. All study procedures have been  
256 approved by the respective Research Ethics Committee of all participating institutions.

### 257 **Data management**

258 We recognize that longitudinal studies require an appropriate data infrastructure that is  
259 sufficiently robust to withstand the test of time [43, 44, 48]. MAVIPAN operates using the  
260 REDCap system, a HIPAA compliant secure data entry system, housed within Université Laval's  
261 Pulsar infrastructure. Data management is under the shared responsibility between the research  
262 team and Pulsar's highly qualified personal. This setting ensures the highest of standards (i.e.  
263 standardized data collection procedure, secured data storage, quality control, daily back-up  
264 system) in a sustainable infrastructure that guaranties housing of the data for years to come.

### 265 **Sample Size**

266 We propose a cost-effective, time sensitive, non-probabilistic purposive sampling paired with  
267 online sampling and a snowballing technique without size restriction. Based of recruitment rate  
268 so far (2,800 participants in the first 5 months of the study), we expect to recruit 5,000  
269 participants by the end of 2021 and 7,500 participants by the end of the study. We recognize bias  
270 and limitations associated with this approach (e.g., sampling error, self-selection, lack of  
271 representation of population) [48]. We have included key sociodemographic questions that will  
272 enable us to compare and weight data to provincial and national standards. We have used similar  
273 validated questions as key institutions such as Statistics Canada to further ensure comparability of  
274 our findings.

### 275 **Analysis**

276 We will pursue analysis under a mixed-method umbrella, with both sequential and simultaneous  
277 analysis of quantitative and qualitative data, to strengthen the breadth and depth in our capacity to  
278 answer our research questions [71]. Findings from the quantitative analysis will inform phases of  
279 qualitative data collection and hypotheses derived from qualitative analysis will inform  
280 subsequent quantitative component. Triangulation will be used to corroborate our findings and  
281 help explain paradoxes or inconsistencies emerging within the qualitative or the quantitative  
282 analysis.

283 Statistical analyses will involve both cross-sectional and longitudinal methods and will be of two-  
284 folds. First, in a cross-sectional fashion, we provide constant, descriptive information for KUs,  
285 enabling them to understand the characteristics of those individuals who are faring well and not  
286 so well during the present crisis [73]. In doing so, we help KUs identify high-risk individuals and  
287 families as a function of different sociodemographic characteristics (e.g., sociodemographic,  
288 occupational) as they relate to mental health problems, social and health behaviors, identified  
289 needs and the use of health and social services (i.e. health inequalities). These analyses will help  
290 identify populations that may be easily targeted for immediate health services or intervention to  
291 improve the state of our service structures.

292 Then, we will conduct analyses that will help us identify empirically-derived groups in  
293 adjustment as a function of time or other variables (i.e. identify individual differences in risk with  
294 the added benefits of multiple measures of adjustment). We will conduct generalized linear  
295 mixed models that will allow us to make associations between events that unfold and characterize  
296 the current crisis and individual adjustment across time, informing resilience trajectories, coping  
297 and adaptation mechanisms as well as cumulative burden experienced by subgroups of the  
298 population [74]. In-depth analyses of the factors contributing to the health and well-being (or lack

299 of) of these subgroups will further inform on the mechanism underlying the aggravation of health  
300 inequalities.

301 Lastly, we will develop analytical strategies tailored to each research question. These strategies  
302 will likely include range of methods appropriate for cross-sectional, longitudinal, linked data and  
303 causal modelling when relevant, adjusting for missing data where necessary. We will account for  
304 sex and gender-based analysis and use an intersectionality approach to explain potential  
305 comparisons with emerging key factors (sex, age, and race) in outcomes of COVID-19. We  
306 perform analysis using SAS (version 9.2) or R (version 4.0.1) software package.

307 Our overall qualitative approach will rely on thematic analysis (although other approaches, such  
308 as a narrative approach to qualitative inquiry whereby accounts of experience are explored from  
309 the life perspective, could be added if relevant) [71, 75]. Audio or video recorded interviews will  
310 be transcribed in verbatim, de-identified, and verified against actual recordings by team members.  
311 We will audio or video record focus groups, which will be complemented by the moderator and  
312 an observer observational notes. We will follow best practices for data management and  
313 organisation, coding, and analysis, using the most relevant software (NVivo, QDA Miner or  
314 Noldus Observer) [71, 75].

315 Furthermore, throughout the study, we will conduct cross-comparisons between the ancillary  
316 protocols (including a meta-analysis of all qualitative results), which will contribute to a  
317 conceptual framework on the health impact and adaptation strategies during a world-wide  
318 pandemic.

### 319 **Transparency of Research & Data Sharing**

320 Transparency of MAVIPAN will be evident in the clarity and completeness of datasets,  
321 codebooks and supporting documentation, many already available [47]. The substantial

322 investments necessary to build these large studies and the unprecedented nature of this health  
323 crisis argue for optimal utilization of MAVIPAN. Data produced as a result of this study will be  
324 shared in line with the Canadian Institute of Health Research joint statement on sharing research  
325 data and findings relevant to this coronavirus outbreak. Resulting publications will be open  
326 access.

327 Researchers and collaborators will be able to submit research questions and obtain access to data  
328 sets. Questions being investigated will be posted on our website to avoid redundancy and  
329 promote collaboration within the research community, healthcare institutions, public health  
330 agencies, government officials and community organizations.

### 331 **Governance**

332 Large longitudinal cohort studies are demanding and require sound and sustainable infrastructure  
333 and governance. We have set in place an equitable, inclusive and sustainable Governance Plan  
334 that fully includes citizens, patients, other KUs, experts, and representatives from participating  
335 research centers, health establishments, and organizations across the Province.

336 We have established (i) a Steering Committee (quarterly meetings) that provides strategic  
337 leadership, including research question priorities, milestones and national and international  
338 collaborations, facilitate research and knowledge translation activities, (ii) an Executive  
339 Committee (monthly meetings) that reviews requests for collaboration and submission of  
340 research questions (i.e. alignment with research priorities and feasibility), progress and  
341 challenges of ongoing work, approval of publications to be submitted, and scholarship process for  
342 graduate students, and (iii) a Lead Research Team (bi-weekly meetings) that will handle the day-  
343 to-day operations of MAVIPAN.

### 344 **Study Status**

345 MAVIPAN was developed and launched within six weeks of the first confinement in March  
346 2020. It was designed with the aim to be flexible and adapt according to the pandemic evolution  
347 and resolution and its associated restrictive measures in the upcoming 5 years. The study is  
348 currently opened for enrollment.

### 349 **Knowledge translation plans**

350 We have a well-defined iKT approach where KUs are involved throughout the research process  
351 and contribute to just-in-time diffusion and dissemination of research progress and outputs. We  
352 are providing, on an as-needed basis, following the crisis evolution, personalized (i.e. as a  
353 function of region or clientele) updates to KUs. Our KUs and collaborators are helping build  
354 community partnerships and assisting us with translation and dissemination of findings. Our  
355 bilingual website [47] and those of our collaborators will be an important tool for communicating  
356 our findings to other populations, stakeholders and research groups in Quebec, Canada and  
357 internationally. We will have plain language summaries posted on the website. Moreover, as the  
358 launch of the cohort drew media attention, we will build upon this interest, disseminating  
359 findings through news media and social networks. Furthermore, each of the research centres and  
360 healthcare institutions involved engages actively in KT towards practitioners and professionals,  
361 stakeholders and administrators, service users and other sectors of the population. Each of these  
362 platforms will be leveraged to ensure that pertinent information is constantly transmitted.

## 363 **DISCUSSION**

### 364 **Anticipated Outcomes and Impact**

365 The COVID-19 health crisis has caused an unprecedented scientific collaboration. Worldwide,  
366 scientists of different countries and background have come together, rapidly sharing the most  
367 recent and relevant information about the pandemic. MAVIPAN takes part in this international



368 scientific collaboration. As the epicentre of the pandemic in Canada, the province of Quebec is  
369 now a unique living laboratory to measure, understand and act on the impact of public health  
370 measures on population's health and well-being. Results produced with MAVIPAN add new,  
371 unique and most relevant information to other governments and population in Canada, North  
372 America and worldwide to adjust the public health response in the next months and years. As  
373 other important waves of virus outbreaks are expected to take place, the MAVIPAN experience is  
374 central to improve the public health response.

375 MAVIPAN has the potential to be a critical component of the response to COVID-19 as it can  
376 initiate new rapid response to unmet needs. It can support institutions in the mental health and  
377 social services network and inform the evidence base underpinning the deployment and  
378 organization of services in times of crisis and in the recovery period. MAVIPAN's unique  
379 infrastructure will increase the potential for data collection to be harmonized, shared and  
380 integrated across COVID-19 related initiatives. It will promote an agile, multidisciplinary and  
381 collaborative approach to research and address challenging and important COVID-19 research  
382 questions in a concerted and high-impact manner. Findings from MAVIPAN will improve our  
383 understanding of the psychosocial impacts, the coping mechanisms and adaptive strategies that  
384 have emerged from the restrictive measures of this unprecedented pandemic.

### 385 **Limitations, anticipated problems and solutions**

386 A major source of potential bias in cohort studies is due to losses to follow-up [44]. Cohort  
387 members may migrate or refuse to continue to participate in the study. We have put a sound and  
388 proven-effective retention plan in place. Open registration throughout the study compensates, to  
389 some extent, for loss to follow-up. We will also assess the seriousness of the bias in the measures  
390 of effect of exposure and outcome that this may cause in incorporating this issue in our analysis

391 plans. We have overcome issues of variations in data collection that sometime occurs in multi-  
392 centered studies. All quantitative data collection is done through a unique platform and we have  
393 established a common template for all qualitative activities. The collaboration with Pulsar ensures  
394 that issues of management of such a large database (i.e. cost) are minimized and sustainability of  
395 the database secured.

## 396 **CONCLUSION**

397 Launched in April 2020 across the Province of Quebec (Canada), MAVIPAN documents health,  
398 mental health, social, behavioral, environmental and individual determinants and psychosocial  
399 impacts of the pandemic. It is a unique initiative that will contribute in the upcoming months and  
400 years to a coherent and integrated mitigation strategies response from health, mental health and  
401 social services workers, researchers, public health authorities, policymakers, and the healthcare  
402 system, within and across jurisdictions in Canada.

## 403 **DECLARATIONS**

### 404 **Ethics Approval**

405 This study is approved by the Ethics Committee of the Primary Care and Population Health  
406 Research Sector of the CIUSSS de la Capitale-Nationale (Reference number: 2021-2043).

### 407 **Competing Interests**

408 The authors declare that they have no competing interests.

### 409 **Funding**

410 Funding for this study comes from discretionary funds from the four Research Centers of the  
411 Quebec Integrated University Health and Social Services Center (Vitam: Centre de recherche en

412 santé durable, Centre de recherche universitaire sur les jeunes et les familles (CRUJeF), Centre  
413 interdisciplinaire de recherche en réadaptation et intégration sociale (CIRRIIS), Centre de  
414 recherche CERVO).

#### 415 **Author's contribution**

416 The following authors conceived the study, co-wrote the first draft, and made critical revisions to  
417 the manuscript: (AL, MB, PB, JPD, YDK, CM, GT, CM, FR). The following authors participated  
418 to the design of the study and made critical revisions to the manuscript: (CC, DCV, NC, ED, RF,  
419 MHG, MI, LL, MM, CM, MCO, MAR, MCSJ, CS). The following authors contributed to the  
420 design of the study and provided revisions of the manuscripts (AB, MP, MPG, DL, MEL, HW,  
421 PA, GR, AV, MHM, MG, ESH, AG, EG, DN, JT, GD, MCS, SBB, NB, MFD, PM, LV). All  
422 authors approved the final version of this manuscript.

#### 423 **Acknowledgements**

424 MAVIPAN Research Collaborative would like to acknowledge the following research team  
425 members for their time and implication in this research: Léa Langlois, Frédéric Cantin, Josiane  
426 Lettre and Geneviève Picher. We would also like to acknowledge the ongoing support and  
427 collaboration of the PULSAR team, including Laurence Dionne-Bibaud, Audrey St-Laurent,  
428 Marie-Andrée Lévesque and Carole Artault, the CIUSSS-CN Ethics committee, the CIUSSS de  
429 la Capitale-Nationale, the CISSS Chaudière-Appalaches, CISSS Bas-Saint-Laurent, CISSS Côte-  
430 Nord, and all our partners in the project. For the complete list, please go to [www.mapivan.ca](http://www.mapivan.ca) .  
431 Finally, we would like to give special thanks to all citizens and participants who give us feedback  
432 and support in the MAVIPAN project.

433

434

435

436

437

438

## REFERENCES

- 439 1. Holmes EA, O'Connor RC, Perry VH, Tracey I, Wessely S, Arseneault L, Ballard C,  
440 Christensen H, Cohen Silver R, Everall I *et al*: Multidisciplinary Research Priorities for  
441 the Covid-19 Pandemic: A Call for Action for Mental Health Science. *Lancet Psychiatry*  
442 2020, 7(6):547-560.
- 443 2. Gostin LO, Wiley LF: Governmental Public Health Powers During the Covid-19  
444 Pandemic: Stay-at-Home Orders, Business Closures, and Travel Restrictions. *JAMA*  
445 2020, 323(21):2137-2138.
- 446 3. Usher K, Bhullar N, Jackson D: Life in the Pandemic: Social Isolation and Mental Health.  
447 *J Clin Nurs* 2020, 29(15-16):2756-2757.
- 448 4. Brooks SK, Webster RK, Smith LE, Woodland L, Wessely S, Greenberg N, Rubin GJ:  
449 The Psychological Impact of Quarantine and How to Reduce It: Rapid Review of the  
450 Evidence. *Lancet* 2020, 395(10227):912-920.
- 451 5. Hossain MM, Sultana A, Purohit N: Mental Health Outcomes of Quarantine and Isolation  
452 for Infection Prevention: A Systematic Umbrella Review of the Global Evidence.  
453 *Epidemiol Health* 2020:e2020038.

- 454 6. Röhr S, Müller F, Jung F, Apfelbacher C, Seidler A, Riedel-Heller SG: Psychosocial  
455 Impact of Quarantine Measures During Serious Coronavirus Outbreaks: A Rapid Review.  
456 Psychiatr Prax 2020, 47(4):179-189.
- 457 7. Dubey S, Biswas P, Ghosh R, Chatterjee S, Dubey MJ, Chatterjee S, Lahiri D, Lavie CJ:  
458 Psychosocial Impact of Covid-19. Diabetes Metab Syndr 2020, 14(5):779-788.
- 459 8. Nicola M, Alsafi Z, Sohrabi C, Kerwan A, Al-Jabir A, Iosifidis C, Agha M, Agha R: The  
460 Socio-Economic Implications of the Coronavirus and Covid-19 Pandemic: A Review. Int  
461 J Surg 2020, 78:185-193.
- 462 9. Otu A, Charles CH, Yaya S: Mental Health and Psychosocial Well-Being During the  
463 Covid-19 Pandemic: The Invisible Elephant in the Room. Int J Ment Health Syst 2020,  
464 14:38.
- 465 10. Rubin GJ, Wessely S: The Psychological Effects of Quarantining a City. BMJ 2020,  
466 368:m313.
- 467 11. Liu JJ, Bao Y, Huang X, Shi J, Lu L: Mental Health Considerations for Children  
468 Quarantined Because of Covid-19. Lancet Child Adolesc Health 2020, 4(5):347-349.
- 469 12. Moser DA, Glaus J, Frangou S, Schechter DS: Years of Life Lost Due to the Psychosocial  
470 Consequences of Covid-19 Mitigation Strategies Based on Swiss Data. Eur Psychiatry  
471 2020, 63(1):e58.
- 472 13. Brand JE: The Far-Reaching Impact of Job Loss and Unemployment. Annual Review of  
473 Sociology 2015, 41:359-375.
- 474 14. Buzzi C, Tucci M, Ciprandi R, Brambilla I, Caimmi S, Ciprandi G, Marseglia GL: The  
475 Psycho-Social Effects of Covid-19 on Italian Adolescents' Attitudes and Behaviors. Ital J  
476 Pediatr 2020, 46(1):69.

- 477 15. Lavner JA, Clark MA: Workload and Marital Satisfaction over Time: Testing Lagged  
478 Spillover and Crossover Effects During the Newlywed Years. *Journal of Vocational*  
479 *Behavior* 2017, 101:67-76.
- 480 16. Nichol KL, Baken L, Nelson A: Relation between Influenza Vaccination and Outpatient  
481 Visits, Hospitalization, and Mortality in Elderly Persons with Chronic Lung Disease.  
482 *Annals of Internal Medicine* 1999, 130(5):397-403.
- 483 17. Tanoue Y, Nomura S, Yoneoka D, Kawashima T, Eguchi A, Shi S, Harada N, Miyata H:  
484 Mental Health of Family, Friends, and Co-Workers of Covid-19 Patients in Japan.  
485 *Psychiatry Res* 2020, 291:113067.
- 486 18. Banks J, Karjalainen H, Propper C: Recessions and Health: The Long-Term Health  
487 Consequences of Responses to Coronavirus. *Fiscal Studies* 2020, 41(2):337-344.
- 488 19. Charil A, Laplante DP, Vaillancourt C, King S: Prenatal Stress and Brain Development.  
489 *Brain Research Reviews* 2010, 65(1):56-79.
- 490 20. Desjardins T, Leadbeater BJ: Changes in Parental Emotional Support and Psychological  
491 Control in Early Adulthood: Direct and Indirect Associations with Educational and  
492 Occupational Adjustment. *Emerging Adulthood* 2017, 5(3):177-190.
- 493 21. Fitzpatrick KM, Harris C, Drawve G: Fear of Covid-19 and the Mental Health  
494 Consequences in America. *Psychol Trauma* 2020, 2(S1):S17-S21.
- 495 22. Guilcher SJT, Craven BC, Bassett-Gunter RL, Cimino SR, Hitzig SL: An Examination of  
496 Objective Social Disconnectedness and Perceived Social Isolation among Persons with  
497 Spinal Cord Injury/Dysfunction: A Descriptive Cross-Sectional Study *Disability and*  
498 *Rehabilitation* 2019.

- 499 23. Holt-Lunstad J, Smith TB, Baker M, Harris T, Stephenson D: Loneliness and Social  
500 Isolation as Risk Factors for Mortality. *Perspectives on Psychological Science* 2015,  
501 10(2):227-237.
- 502 24. Qiu J, Shen B, Zhao M, Wang Z, Xie B, Xu Y: A Nationwide Survey of Psychological  
503 Distress among Chinese People in the Covid-19 Epidemic: Implications and Policy  
504 Recommendations. *Gen Psychiatr* 2020, 33(2):e100213.
- 505 25. Lebrasseur A, Fortin-Bédard N, Lettre J, Bussièrès E-L, Best K, Boucher N, Hotton M,  
506 Beaulieu-Bonneau S, Mercier C, Lamontagne M-È *et al*: Impact of Covid-19 on People  
507 with Physical Disabilities: A Rapid Review. *Disability and Health Journal* (Accepted).
- 508 26. Ripp J, Peccoralo L, Charney D: Attending to the Emotional Well-Being of the Health  
509 Care Workforce in a New York City Health System During the Covid-19 Pandemic. *Acad*  
510 *Med* 2020.
- 511 27. Shanafelt T, Ripp J, Trockel M: Understanding and Addressing Sources of Anxiety  
512 among Health Care Professionals During the Covid-19 Pandemic. *JAMA* 2020,  
513 323(21):2133-2134.
- 514 28. Tarabulsy GM, Rousseau M, Lacerte D, Chateauneuf D, Vaillancourt A: Hausse Des  
515 Signalements À La Protection De La Jeunesse : Un Examen des Causes Possibles à la  
516 Grandeur du Québec. Rapport déposé au Ministère de la santé et des services sociaux.;  
517 2020.
- 518 29. Vassos M, Nankervis K, Skerry T, Lante K: Can the Job Demand-Control-(Support)  
519 Model Predict Disability Support Worker Burnout and Work Engagement? *Journal of*  
520 *Intellectual & Developmental Disability* 2017, 44(2):139-149.
- 521 30. Fukuti P, Uchôa CLM, Mazzoco MF, Corchs F, Kamitsuji CS, Rossi L, Rios IC,  
522 Lancman S, Bonfa E, Barros-Filho TEP *et al*: How Institutions Can Protect the Mental

- 523 Health and Psychosocial Well-Being of Their Healthcare Workers in the Current Covid-  
524 19 Pandemic. *Clinics* 2020, 75:e1963.
- 525 31. Zerbini G, Ebigo A, Reicherts P, Kunz M, Messman H: Psychosocial Burden of  
526 Healthcare Professionals in Times of Covid-19 - A Survey Conducted at the University  
527 Hospital Augsburg. *Ger Med Sci* 2020, 18:Doc05.
- 528 32. Fawaz M, Samaha A: The Psychosocial Effects of Being Quarantined Following  
529 Exposure to Covid-19: A Qualitative Study of Lebanese Health Care Workers. *Int J Soc*  
530 *Psychiatry* 2020:20764020932202.
- 531 33. Saleem M, Dastgeer S, Durrani AK, Saad AA, Manzoor Z, Hussain HN: Self-Control  
532 Mediates the Relationship between Psychosocial Strengths and Perceived Severity of  
533 Covid-19 among Frontline Healthcare Professionals of Pakistan: A Single Center  
534 Experience. *Pak J Med Sci* 2020, 36(Covid19-s4):S62-S66.
- 535 34. Harris C, Carson G, Baillie JK, Horby P, Nair H: An Evidence-Based Framework for  
536 Priority Clinical Research Questions for Covid-19. *J Glob Health* 2020, 10(1):011001.
- 537 35. Canadian Institutes of Health Research: Guide to Knowledge Translation Planning at  
538 Cihr: Integrated and End-of-Grant Approaches. Ottawa, ON; 2012.
- 539 36. Research CIOH: Strategy for Patient-Oriented Research: Patient Engagement Framework.  
540 Ottawa, ON; 2012.
- 541 37. Bell PA, Greene TC, Fisher JD, Baum A: *Environmental Psychology*: Harcourt College  
542 Publishers; 2001.
- 543 38. Dahlgren G, Whitehead M: Policies and Strategies to Promote Social Equity in Health.  
544 Background Document to Who-Strategy Paper for Europe; 1991.
- 545 39. Dawes DE: The Future of Health Equity in America: Addressing the Legal and Political  
546 Determinants of Health. *The Journal of Law, Medicine & Ethics* 2018, 46(4):838-840.



- 547 40. Dawes DE: Health Inequities: A Look at the Political Determinants of Health During the  
548 Covid-19 Pandemic. *American Journal of Health Studies* 2020, 35(2):77-82.
- 549 41. Mishori R: The Social Determinants of Health? Time to Focus on the Political  
550 Determinants of Health! *Medical Care* 2019, 57(7):491-493.
- 551 42. Baron M, Blouin P, LeBlanc A, et al. : Document méthodologique – Informations  
552 générales. Retrieved from [www.mavipan.ca](http://www.mavipan.ca). 2020
- 553 43. Caruana EJ, Roman M, Hernández-Sánchez J, Solli P: Longitudinal Studies. *Journal of*  
554 *thoracic disease* 2015, 7(11):E537.
- 555 44. van Weel C: Longitudinal Research and Data Collection in Primary Care. *The Annals of*  
556 *Family Medicine* 2005, 3(Suppl1):S46-S51.
- 557 45. Creswell JW, Fetters MD, Ivankova NV: Designing a Mixed Methods Study in Primary  
558 Care. *The Annals of Family Medicine* 2004, 2(1):7-12.
- 559 46. Government of Canada: Coronavirus Disease (Covid-19): Outbreak Update.  
560 [https://www.canada.ca/en/public-health/services/diseases/2019-novel-coronavirus-](https://www.canada.ca/en/public-health/services/diseases/2019-novel-coronavirus-infection.html)  
561 [infection.html](https://www.canada.ca/en/public-health/services/diseases/2019-novel-coronavirus-infection.html). Accessed 04 November 2020.
- 562 47. The MAVIPAN study website. [www.mavipan.ca](http://www.mavipan.ca). Accessed 06 November 2020.
- 563 48. Frippiat D, Marquis N: Web Surveys in the Social Sciences: An Overview. *Population*  
564 2010, 65(2):285-311.
- 565 49. Robinson KA, Dinglas VD, Sukrithan V, Yalamanchilli R, Mendez-Tellez PA, Dennison-  
566 Himmelfarb C, Needham DM: Updated Systematic Review Identifies Substantial Number  
567 of Retention Strategies: Using More Strategies Retains More Study Participants. *Journal*  
568 *of Clinical Epidemiology* 2015, 68(12):1481-1487.

- 569 50. Sánchez-Fernández J, Muñoz-Leiva F, Montoro-Ríos FJ: Improving Retention Rate and  
570 Response Quality in Web-Based Surveys. *Computers in Human Behavior* 2012,  
571 28(2):507-514.
- 572 51. Teague S, Youssef GJ, Macdonald JA, Sciberras E, Shatte A, Fuller-Tyszkiewicz M,  
573 Greenwood C, McIntosh J, Olsson CA, Hutchinson D: Retention Strategies in  
574 Longitudinal Cohort Studies: A Systematic Review and Meta-Analysis. *BMC Medical*  
575 *Research Methodology* 2018, 18(1):151.
- 576 52. PULSAR. [www.pulsar.ca](http://www.pulsar.ca). Accessed 06 November 2020.
- 577 53. Canuel M, Gosselin P, Duhoux A, Brunet A, Lesage A: Boîte À Outils Pour La  
578 Surveillance Post-Sinistre Des Impacts Sur La Santé Mentale : Changements Climatiques  
579 (Toolkit for the Monitoring of Mental Health Post-Disasters). Montreal: Institut national  
580 de santé publique du Québec; 2019.
- 581 54. Abidin RR: *Parenting Stress Index: Professional Manual.*, 3rd edn. Odessa, FL:  
582 Psychological Assessment Resources, Inc.; 1995.
- 583 55. Baillargeon J, Dubois G, Marineau R: Traduction Française De L' Échelle D'ajustement  
584 Dyadique. *Canadian Journal of Behavioural Science* 1986, 18(1):25-34.
- 585 56. Caron J: A Validation of the Social Provisions Scale: The Sps-10 Items. *Santé mentale au*  
586 *Quebec* 2013, 38(1):297-318.
- 587 57. Carver C: You Want to Measure Coping but Your Protocol's Too Long: Consider the  
588 Brief Cope. *International Journal of Behavioral Medicine* 1997, 4(1):92-100.
- 589 58. Clement ME, Gagne M, Chamberland C: French Adaptation and Validation of the Parent-  
590 Child Conflict Tactics Scales (Pc-Cts). *European Review of Applied Psychology* 2018,  
591 68(3):141-149.

- 592 59. Cutrona C, Russell D: The Provision of Social Support and Adaptation to Stress. *Advance*  
593 *in Personal Relationships* 1987, 1:37-67.
- 594 60. De Grâce G-R, Joshi P, Pelletier R: L'échelle De Solitude De L'université Laval ( Ésul ):  
595 Validation Canadienne-Française Du UCLA Loneliness Scale. *Canadian Journal of*  
596 *Behavioural Science* 1993, 25(1):12-27.
- 597 61. Derogatis LR: Symptom Checklist-90-R: Administration, Scoring & Procedure Manual  
598 for the Revised Version of the Scl-90. Minneapolis, MN: National Computer System;  
599 1994.
- 600 62. Dumka LE, Stoerzinger HD, Jackson KM, Roosa MW: Examination of the Cross-Cultural  
601 and Cross-Language Equivalence of the Parenting Self-Agency Measure. *Family*  
602 *Relations* 1996, 45(2):216-222.
- 603 63. Gräbel E, Adabbo R: Perceived Burden of Informal Caregivers of a Chronically Ill Older  
604 Family Member: Burden in the Context of the Transactional Stress Model of Lazarus and  
605 Folkman. *GeroPsych: The Journal of Gerontopsychology and Geriatric Psychiatry* 2011,  
606 24(3):143-154.
- 607 64. Hughes ME, Waite LJ, Hawkey LC, Cacioppo JT: A Short Scale for Measuring  
608 Loneliness in Large Surveys:Results from Two Population-Based Studies. *Research on*  
609 *Aging* 2004, 26(6):655-672.
- 610 65. Lovibond SH, Lovibond PF: Manual for the Depression Anxiety Stress Scales, 2nd edn.  
611 Sydney: Psychology Foundation of Australia; 1995.
- 612 66. Morin CM: *Insomnia : Psychological Assessment and Management*. New York: Guilford  
613 Press; 1993.
- 614 67. Rushton PJ, Chrisjohn RD, Fekken. GC: The Altruistic Personality and the Self-Report  
615 Altruism Scale. *Personality and Individual Differences* 1981, 2(4):293-302.

- 616 68. Spanier GB: Measuring Dyadic Adjustment: New Scales for Assessing the Quality of  
617 Marriage and Similar Dyads. *Journal of Marriage and Family* 1976, 38(1):15-28.
- 618 69. Straus MA, Hamby SL, Finkelhor D, Moore DW, Runyan D: Identification of Child  
619 Maltreatment with the Parent-Child Conflict Tactics Scales: Development and  
620 Psychometric Data for a National Sample of American Parents. *Child Abuse & Neglect*  
621 1998, 22(4):249-270.
- 622 70. Tennant R, Hiller L, Fishwick R, Platt S, Joseph S, Weich S, Parkinson J, Secker J,  
623 Stewart-Brown S: The Warwick-Edinburgh Mental Well-Being Scale (WEMWBS):  
624 Development and Uk Validation. *Health and Quality of Life Outcomes* 2007, 5(1):63.
- 625 71. Creswell JW: *Research Design: Qualitative, Quantitative, and Mixed Methods*  
626 *Approaches*, 4th edn: SAGE Publications; 2014.
- 627 72. Tong A, Sainsbury P, Craig J: Consolidated Criteria for Reporting Qualitative Research  
628 (Coreq): A 32-Item Checklist for Interviews and Focus Groups. *International Journal for*  
629 *Quality in Health Care* 2007, 19(6):349-357.
- 630 73. Judd CM, McClelland GH, Ryan CS: *Data Analysis: A Model Comparison Approach to*  
631 *Regression, Anova, and Beyond*: Routledge; 2017.
- 632 74. Gad AM, El Kholy RB: *Generalized Linear Mixed Models for Longitudinal Data*.  
633 *International Journal of Probability and Statistics* 2012, 1(3):41-47.
- 634 75. Patton MQ: *Qualitative Research and Evaluation Methods*, 3rd edn: Thousand Oaks:  
635 SAGE Publications; 2002.

**Baseline Questionnaire**  continuous 

**Follow-up questionnaires**          

**Ad hoc questionnaires**     

**Ancillary qualitative data collection**     

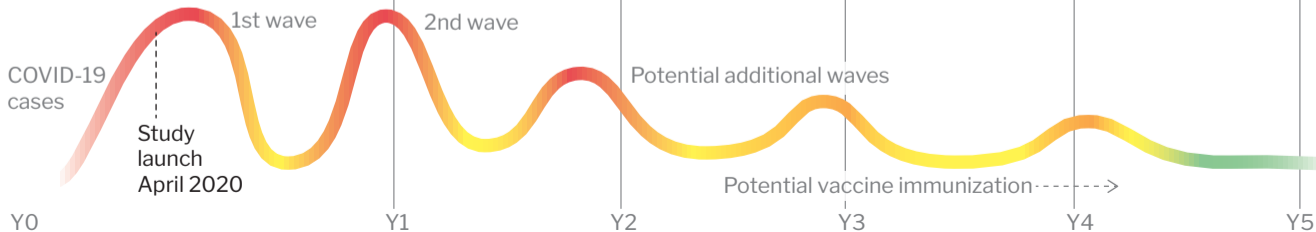

# SUMMARY OF MEASURES

## Baseline and follow-up

### General indicators

#### HEALTH DETERMINANTS

##### Health antecedents

- Perceived physical health
- Perceived mental health
- Satisfaction with life
- Physical chronic illness diagnoses
- Mental health disorders and diagnoses
- Disabilities
- Anthropometric measurements
- Advance care planning

##### COVID-19 exposure

- Exposure to COVID-19
- COVID-19 diagnosis

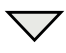

#### INDIVIDUAL DETERMINANTS

##### Demographic, social and economic indicators

- Age and gender
- Socio-economic status
- Household composition
- Dependants
- Immigration status
- Employment status (essential worker, teleworking)
- Loved one in nursing home
- Dwelling characteristics

##### Geographic indicators

- Region
- Rural, peri-urban or urban area
- Neighborhood (for urban areas)

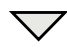

#### SOCIAL AND BEHAVIORAL DETERMINANTS

##### Social and behavioral indicators

- Social support
- Altruistic behavior
- Coping strategies
- Physical and leisure activities

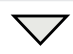

### PSYCHOSOCIAL IMPACT

#### Psychosocial impact indicators

- Perceived physical health
- Perceived mental health
- Satisfaction with life
- Wellbeing
- Sleep quality
- Stress, depression and anxiety symptoms
- Loneliness
- Hostility
- Food, tobacco and drug consumption
- Fears about seeking health or social care services
- Testimonies : lived experiences

### Specific indicators for vulnerable populations

#### Young people 14 - 17

- Relationships in foster home or youth centre

#### Families

- Couple and ex-partner relationships
- Children's behavior
- Behavior towards children

#### People suffering from chronic illnesses

- Medication observance/adherence
- Ability to get one's prescribed medication

#### People suffering from mental health disorders

- Medication observance/adherence
- Ability to get one's prescribed medication

#### People with disabilities

- Impact of the quality of the living environment
- Lifestyle habits

#### Natural caregivers

- Role and relationship with person being cared for
- Lived experience of lockdown (carers of children)

#### Healthcare and social services system stakeholders

- Working conditions, fatigue
- Job perception
- Concerns, needs, factors for wellbeing

**Highlighted indicators are measured at both baseline and follow-up**
